# Supplementary material for: Genome-Scale Mapping Reveals Complex Regulatory Activities of RpoN in Yersinia pseudotuberculosis
Source: PubMed Central journal article supplement (PMC7657599; doi:10.1128/msystems.01006-20), 2020-11-10

Figure S1:

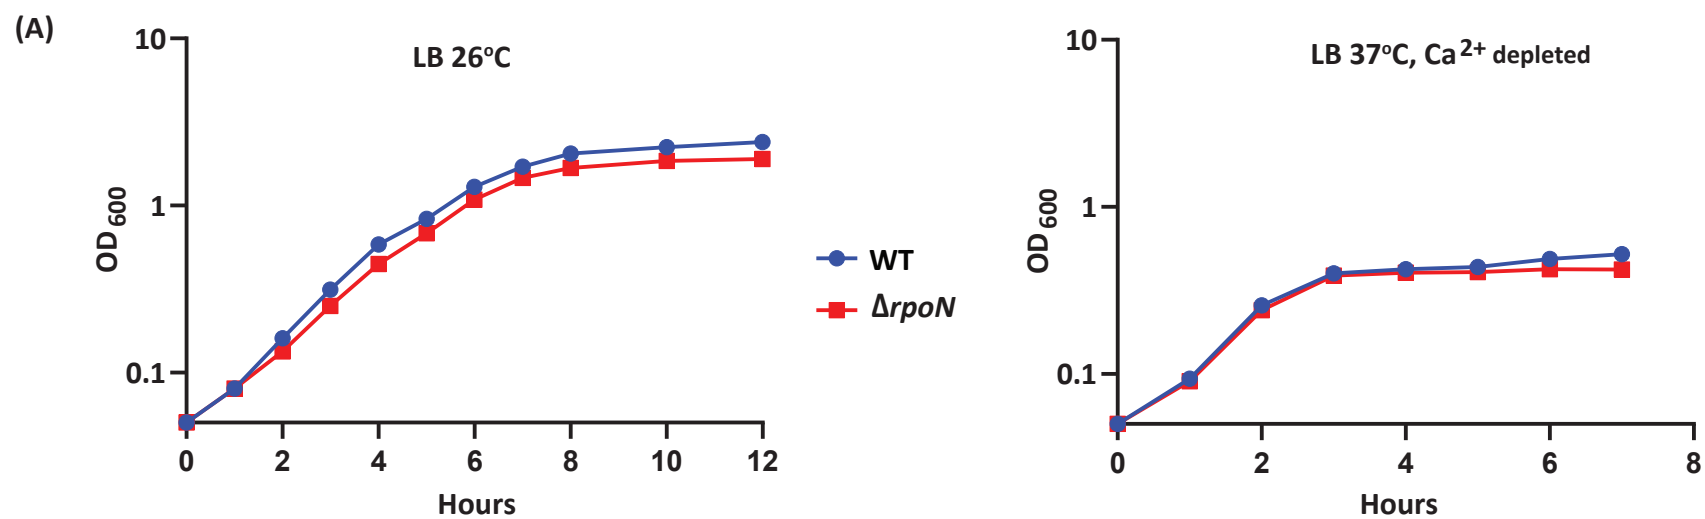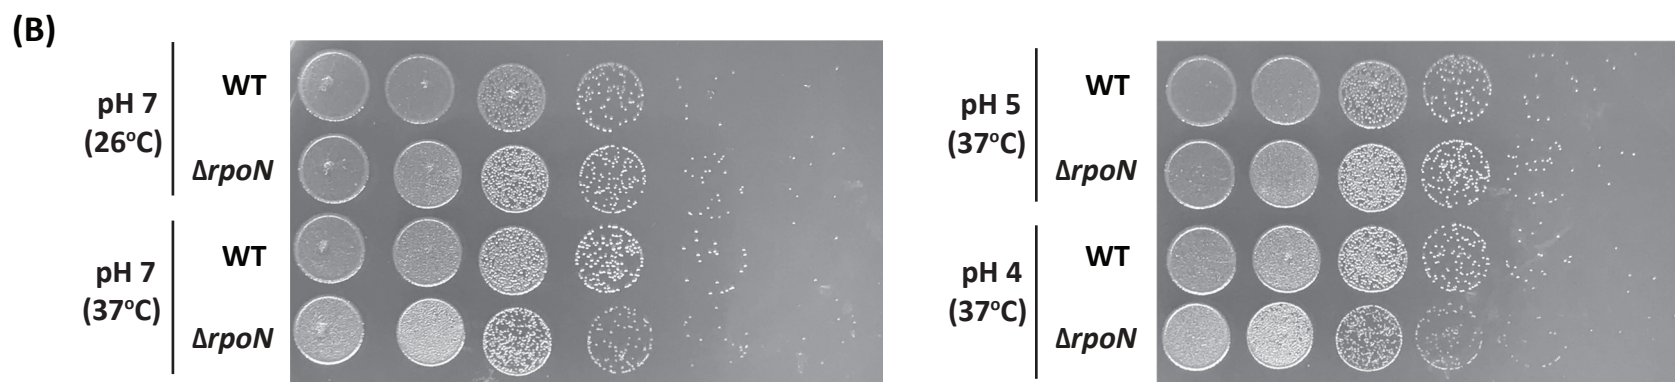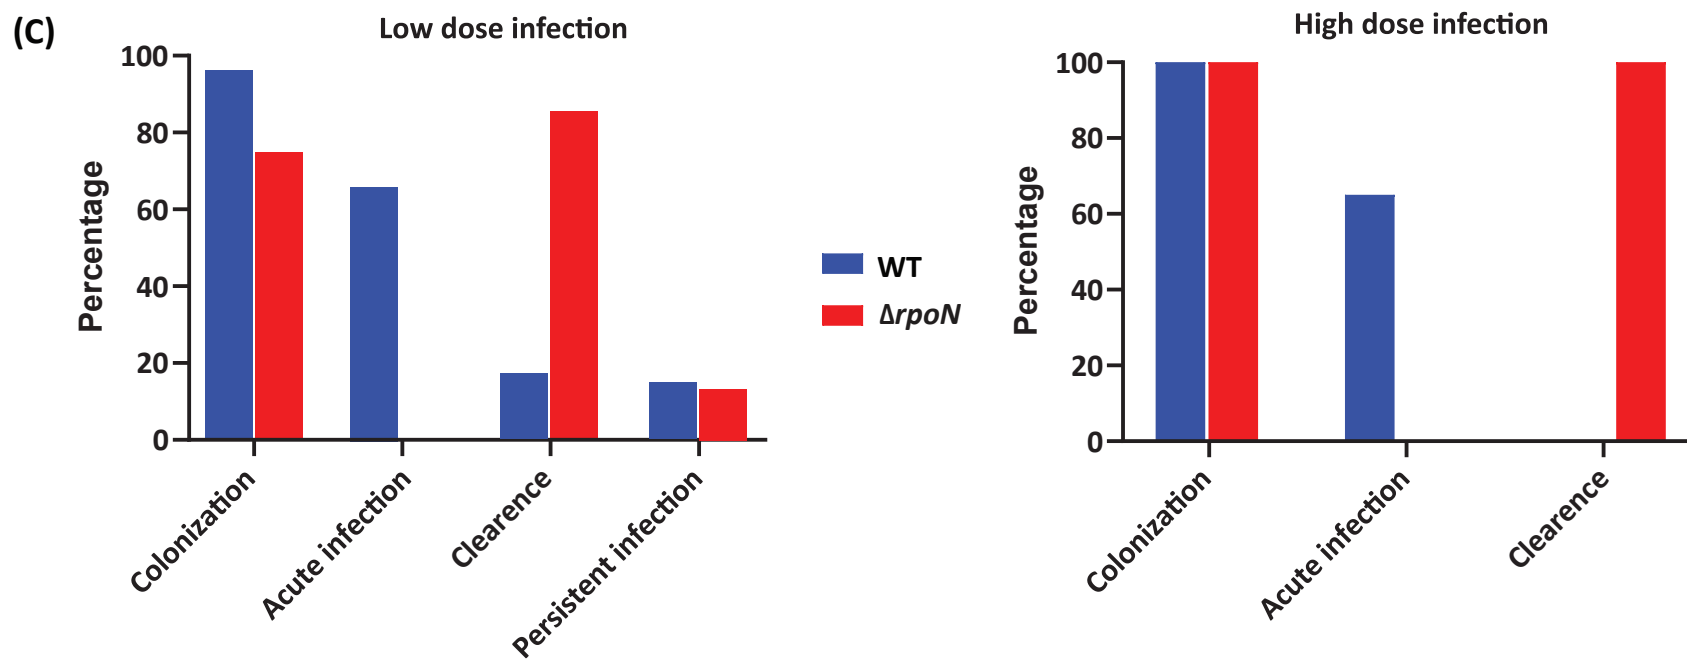

Supplement: mSystems.01006-20-sf001.pdf [file mSystems.01006-20-sf001.pdf]
