# Supplementary material for: Genome-Scale Mapping Reveals Complex Regulatory Activities of RpoN in Yersinia pseudotuberculosis
Source: PubMed Central journal article supplement (PMC7657599; doi:10.1128/msystems.01006-20), 2020-11-10
Supplement: mSystems.01006-20-st001.pdf [file mSystems.01006-20-st001.pdf]

**Table S1: ChIP-seq peaks and predicted motif coordinates****Intergenic sense (A sites)**

| Peak  | PC      | PS      | PE      | PL  | MS      | ME      | Strand(+/-) |
|-------|---------|---------|---------|-----|---------|---------|-------------|
| IGS1  | 117503  | 117335  | 117566  | 231 | 117480  | 117497  | +           |
| IGS2  | 353423  | 353215  | 353602  | 387 | 353428  | 353445  | -           |
| IGS3  | 779812  | 779566  | 779995  | 429 | 779821  | 779838  | +           |
| IGS4  | 1127431 | 1127196 | 1127763 | 567 | 1127446 | 1127463 | +           |
| IGS5  | 1384233 | 1383971 | 1384417 | 446 | 1384210 | 1384227 | +           |
| IGS6  | 1469648 | 1469521 | 1469812 | 291 | 1469643 | 1469660 | -           |
| IGS7  | 1700633 | 1700542 | 1700877 | 335 | 1700637 | 1700654 | +           |
| IGS8  | 1770585 | 1770405 | 1770777 | 372 | 1770580 | 1770597 | -           |
| IGS9  | 2092867 | 2092677 | 2093076 | 399 | 2092869 | 2092886 | -           |
| IGS10 | 2101665 | 2101794 | 2102073 | 279 | 2101749 | 2101766 | +           |
| IGS11 | 2153679 | 2153542 | 2153837 | 295 | 2153683 | 2153700 | -           |
| IGS12 | 2194598 | 2194414 | 2194700 | 286 | 2194593 | 2194610 | -           |
| IGS12 | 2194598 | 2194414 | 2194700 | 286 | 2194695 | 2194714 | +           |
| IGS13 | 2298808 | 2298678 | 2299079 | 401 | 2298813 | 2298830 | -           |
| IGS13 | 2298808 | 2298678 | 2299079 | 401 | 2298793 | 2298810 | -           |
| IGS14 | 2473234 | 2473114 | 2473404 | 290 | 2473214 | 2473231 | -           |
| IGS15 | 2990747 | 2990598 | 2990815 | 217 | 2990727 | 2990744 | +           |
| IGS16 | 3172389 | 3171998 | 3172733 | 735 | 3172401 | 3172418 | -           |
| IGS17 | 3205379 | 3205232 | 3205497 | 265 | 3205374 | 3205391 | -           |
| IGS17 | 3205379 | 3205232 | 3205497 | 265 | 3205398 | 3205414 | +           |
| IGS18 | 3225401 | 3225139 | 3225654 | 515 | 3225404 | 3225421 | +           |
| IGS19 | 3300593 | 3300361 | 3300980 | 619 | 3300584 | 3300601 | +           |
| IGS20 | 3311541 | 3311362 | 3311769 | 407 | 3311529 | 3311546 | +           |
| IGS20 | 3311541 | 3311362 | 3311769 | 407 | 3311685 | 3311702 | +           |
| IGS20 | 3311541 | 3311362 | 3311769 | 407 | 3311497 | 3311514 | +           |
| IGS21 | 3520103 | 3519845 | 3520476 | 631 | 3520112 | 3520129 | -           |
| IGS22 | 3650370 | 3650106 | 3650598 | 492 | 3650369 | 3650386 | -           |
| IGS23 | 3651607 | 3651357 | 3651799 | 442 | 3651599 | 3651616 | -           |
| IGS23 | 3651607 | 3651357 | 3651799 | 442 | 3651598 | 3651615 | +           |
| IGS24 | 4250134 | 4249901 | 4250385 | 484 | 4250138 | 4250155 | -           |
| IGS25 | 4358596 | 4358227 | 4358884 | 657 | 4358592 | 4358609 | -           |
| IGS25 | 4358596 | 4358227 | 4358884 | 657 | 4358590 | 4358608 | +           |
| IGS26 | 4621308 | 4620967 | 4621427 | 460 | 4621215 | 4621232 | -           |
| IGS26 | 4621308 | 4620967 | 4621427 | 460 | 4621315 | 4621332 | +           |

**Intergenic antisense (B sites)**

| Peaks | PC      | PS      | PE      | PL  | MS      | ME      | Strand(+/-) |
|-------|---------|---------|---------|-----|---------|---------|-------------|
| IGAs1 | 2892926 | 2892865 | 2893116 | 252 | 2892934 | 2892951 | -           |
| IGAs2 | 3172389 | 3172124 | 3172631 | 507 | 3172260 | 3172277 | +           |
| IGAs3 | 4432739 | 4432505 | 4432875 | 370 | 4432747 | 4432764 | -           |

**Intragenic Sense (C sites)**

| Peak  | PC     | PS     | PE     | PL  | MS     | ME     | Strand(+/-) |
|-------|--------|--------|--------|-----|--------|--------|-------------|
| IrGS1 | 173082 | 172873 | 173404 | 531 | 173107 | 173124 | +           |

|        |         |         |         |     |         |         |   |
|--------|---------|---------|---------|-----|---------|---------|---|
| IrGS2  | 506362  | 506124  | 506627  | 503 | 506637  | 506649  | + |
| IrGS3  | 535257  | 534929  | 535603  | 674 | 535265  | 535282  | - |
| IrGS4  | 613541  | 613373  | 613616  | 243 | 613544  | 613561  | - |
| IrGS5  | 653552  | 653206  | 653866  | 660 | 653539  | 653556  | + |
| IrGS6  | 818023  | 817692  | 818400  | 708 | 818022  | 818039  | - |
| IrGS7  | 821601  | 821323  | 821883  | 560 | 818022  | 818039  | - |
| IrGS8  | 940388  | 940271  | 940540  | 269 | 940374  | 940391  | + |
| IrGS9  | 1141660 | 1141501 | 1141837 | 336 | 1141669 | 1141686 | + |
| IrGS10 | 1225391 | 1225255 | 1225702 | 447 | 1225385 | 1225402 | + |
| IrGS11 | 1308478 | 1308280 | 1308833 | 553 | 1308497 | 1308514 | + |
| IrGS12 | 1475860 | 1475786 | 1476016 | 230 | 1475837 | 1475854 | + |
| IrGS13 | 1528613 | 1528276 | 1528948 | 672 | 1528595 | 1528612 | + |
| IrGS14 | 1605153 | 1604808 | 1605506 | 698 | 1605150 | 1605167 | - |
| IrGS15 | 1930700 | 1930416 | 1930974 | 558 | 1930704 | 1930721 | - |
| IrGS16 | 2058280 | 2057954 | 2058596 | 642 | 2058240 | 2058257 | + |
| IrGS16 | 2058280 | 2057954 | 2058596 | 642 | 2058239 | 2058256 | + |
| IrGS17 | 2211354 | 2211194 | 2211637 | 443 | 2211348 | 2211365 | - |
| IrGS18 | 2408285 | 2407962 | 2408633 | 671 | 2408258 | 2408275 | + |
| IrGS19 | 2536664 | 2536348 | 2536952 | 604 | 2536659 | 2536676 | - |
| IrGS20 | 2598060 | 2597782 | 2598307 | 525 | 2598065 | 2598082 | - |
| IrGS21 | 2599974 | 2599592 | 2600285 | 693 | 2599980 | 2599997 | - |
| IrGS22 | 2663968 | 2663791 | 2664228 | 437 | 2663970 | 2663987 | - |
| IrGS23 | 2760688 | 2760531 | 2760982 | 451 | 2760719 | 2760736 | - |
| IrGS24 | 2815385 | 2815201 | 2815649 | 448 | 2815411 | 2815428 | - |
| IrGS25 | 2870433 | 2870115 | 2870780 | 665 | 2870430 | 2870447 | - |
| IrGS26 | 2978162 | 2977878 | 2978494 | 616 | 2978165 | 2978182 | - |
| IrGS27 | 3075166 | 3075122 | 3075406 | 284 | 3075159 | 3075176 | + |
| IrGS28 | 3195552 | 3195195 | 3195949 | 754 | 3195564 | 3195581 | + |
| IrGS29 | 3266581 | 3266380 | 3266891 | 511 | 3266593 | 3266610 | - |
| IrGS30 | 3276693 | 3266378 | 3266885 | 507 | 3276695 | 3276712 | + |
| IrGS31 | 3386998 | 3386860 | 3387132 | 272 | 3387010 | 3387027 | - |
| IrGS32 | 3448213 | 3448017 | 3448476 | 459 | 3448221 | 3448238 | - |
| IrGS33 | 3491164 | 3490926 | 3491476 | 550 | 3491151 | 3491168 | - |
| IrGS34 | 3558532 | 3558221 | 3558693 | 472 | 3558533 | 3558550 | + |
| IrGS35 | 3621908 | 3621546 | 3622192 | 646 | 3621918 | 3621935 | - |
| IrGS36 | 3658670 | 3658562 | 3658860 | 298 | 3658708 | 3658725 | + |
| IrGS37 | 3674947 | 3674567 | 3675021 | 454 | 3674951 | 3674968 | - |
| IrGS38 | 3948038 | 3947754 | 3948265 | 511 | 3948134 | 3948151 | - |
| IrGS39 | 4007370 | 4007008 | 4007710 | 702 | 4007345 | 4007362 | - |
| IrGS40 | 4106580 | 4106396 | 4106740 | 344 | 4106583 | 4106600 | - |
| IrGS41 | 4186557 | 4186458 | 4186734 | 276 | 4186583 | 4186600 | - |
| IrGS42 | 4216234 | 4215902 | 4216613 | 711 | 4216231 | 4216248 | + |
| IrGS43 | 4341322 | 4341079 | 4341614 | 535 | 4341310 | 4341327 | + |
| IrGS44 | 4441905 | 4441537 | 4442335 | 798 | 4441909 | 4441926 | - |
| IrGS45 | 4448335 | 4447488 | 4448133 | 645 | 4448337 | 4448354 | - |
| IrGS46 | 4561060 | 4560829 | 4561192 | 363 | 4561068 | 4561085 | - |
| IrGS47 | 4584577 | 4584383 | 4584779 | 396 | 4584622 | 4584640 | + |
| IrGS48 | 4602274 | 4602126 | 4602555 | 429 | 4602283 | 4602300 | + |
| IrGS49 | 4612122 | 4611914 | 4612371 | 457 | 4612121 | 4612138 | - |

**Intragenic Antisense (D sites)**

| Peak    | PC      | PS      | PE      | PL  | MS      | ME      | Strand(+/-) |
|---------|---------|---------|---------|-----|---------|---------|-------------|
| IrGAs1  | 128696  | 128547  | 128941  | 394 | 128693  | 128710  | -           |
| IrGAs2  | 318299  | 318042  | 318459  | 417 | 318307  | 318325  | -           |
| IrGAs3  | 549836  | 549434  | 550118  | 684 | 549839  | 549856  | +           |
| IrGAs4  | 630656  | 630485  | 630727  | 242 | 774332  | 774349  | -           |
| IrGAs5  | 1053922 | 1053559 | 1054157 | 598 | 1053905 | 1053922 | +           |
| IrGAs6  | 1099750 | 1099614 | 1099867 | 253 | 1099724 | 1099741 | +           |
| IrGAs7  | 1204307 | 1204216 | 1204485 | 269 | 1204262 | 1204451 | -           |
| IrGAs8  | 1265403 | 1265110 | 1265727 | 617 | 1265417 | 1265434 | -           |
| IrGAs9  | 1357208 | 1357023 | 1357495 | 472 | 1357220 | 1357237 | -           |
| IrGAs10 | 1894351 | 1894135 | 1894739 | 604 | 1894347 | 1894364 | -           |
| IrGAs11 | 2058280 | 2057954 | 2058596 | 642 | 2058241 | 2058258 | -           |
| IrGAs12 | 2760688 | 2760450 | 2760865 | 415 | 2760967 | 2760985 | +           |
| IrGAs13 | 3195552 | 3195195 | 3195949 | 754 | 3195565 | 3195582 | -           |
| IrGAs14 | 3296918 | 3296428 | 3297079 | 651 | 3296920 | 3296937 | -           |
| IrGAs15 | 3347078 | 3346748 | 3347300 | 552 | 3347061 | 3347078 | +           |
| IrGAs16 | 3383005 | 3382401 | 3383131 | 730 | 3383011 | 3383028 | -           |
| IrGAs17 | 3435112 | 3434807 | 3435413 | 606 | 3435121 | 3435138 | -           |
| IrGAs18 | 3603190 | 3602998 | 3603508 | 510 | 3603188 | 3603205 | -           |
| IrGAs19 | 3621908 | 3621546 | 3622192 | 646 | 3621895 | 3621912 | +           |
| IrGAs20 | 3984487 | 3984181 | 3984915 | 734 | 3984481 | 3984498 | +           |
| IrGAs21 | 4135862 | 4135537 | 4136232 | 695 | 4135846 | 4135863 | +           |
| IrGAs22 | 4186557 | 4186122 | 4186896 | 774 | 4186572 | 4186589 | +           |
| IrGAs23 | 4288435 | 4287803 | 4288174 | 371 | 4288431 | 4288448 | -           |
| IrGAs24 | 4309656 | 4309597 | 4309829 | 232 | 4309647 | 4309664 | +           |
| IrGAs25 | 4371420 | 4371239 | 4371617 | 378 | 4371412 | 4371429 | +           |

IGS=Intergenic Sense

IGAs=Intergenic Antisense

IrGS=Intragenic Sense

IrGAs=Intragenic Anti sense

PC= Peak Center base pair

PS=Peak Start

PE=Peak End

PL= Peak Length

MS=Motif Start

ME= Motif End
