# Supplementary material for: Genome-Scale Mapping Reveals Complex Regulatory Activities of RpoN in Yersinia pseudotuberculosis
Source: PubMed Central journal article supplement (PMC7657599; doi:10.1128/msystems.01006-20), 2020-11-10
Supplement: mSystems.01006-20-st002.pdf [file mSystems.01006-20-st002.pdf]

Table S2: Low confidence peaks of Rpon binding site

| Peak  |   | PC      | PSL  | PSI  | PSO  | CDS      | Downstream gene    | PSSM | Motif(+/-) | Motif Sequence     |
|-------|---|---------|------|------|------|----------|--------------------|------|------------|--------------------|
| LCP1  | C | 41062   | 2.08 | NA   | NA   | YPK_0038 | YPK_0039           | 5.75 | +          | CCGGTACGGATATTGCGT |
| LCP2  | C | 88103   | 2.57 | NA   | NA   | YPK_0077 | YPK_0078           | 4.36 | -          | TTGGCAGTAATTTTGCTG |
| LCP3  | C | 209084  | 2.34 | NA   | NA   | YPK_0161 | YPK_0160           | 3.26 | -          | TGGGTCCGTTTCTTGCTC |
| LCP4  | D | 312934  | 1.77 | 1.77 | NA   | YPK_0275 | YPK_0276           | 2.55 | +          | ATGGCAACGATTAACCAG |
| LCP5  | A | 319160  | NA   | 2.02 | NA   | NA       | YPK_0282,YPK_283   | 6.08 | +          | CTGGCAAATCTTGCGTAG |
| LCP6  | A | 383821  | 2.30 | 4.31 | NA   | NA       | YPK_0358           | 2.99 | +          | ACTCCCTATAATGCGCAT |
| LCP7  | C | 465181  | 2.58 | NA   | NA   | YPK_0426 | YPK_0425           | 3.90 | -          | TAAGCTTAAAGAATGCAT |
| LCP8  | A | 485490  | 3.34 | 5.35 | 3.88 | NA       | YPK_0444           | 3.70 | -          | TTATCATAGATATCCCTT |
| LCP9  | B | 573233  | 2.46 | 3.14 | NA   | NA       | YPK_0523           | 4.44 | -          | CTGGCACTATCAAAGTTT |
| LCP10 | C | 694997  | NA   | 3.50 | NA   | YPK_0636 | YPK_0637           | 2.76 | +          | TCGAAATGAAAAACCAC  |
| LCP11 | C | 774341  | 3.39 | NA   | NA   | YPK_0712 | YPK_0713, YPK_0714 | 6.40 | +          | TTGGTGAAGAAGCGGCC  |
| LCP12 | C | 860742  | 2.10 | NA   | NA   | YPK_0763 | YPK_0764           | 4.64 | +          | GCGGCACAGATATTGCCG |
| LCP13 | C | 3857936 | NA   | 3.62 | NA   | YPK_3512 | NA                 | 5.12 | +          | TTGGCAGGGTTAGGGATT |
| LCP14 | C | 4195472 | NA   | 7.02 | NA   | YPK_3807 | NA                 | 4.74 | +          | TCGGTACGGGGTGCGCAT |
| LCP15 | D | 4592326 | 1.75 | NA   | NA   | YPK_4161 | YPK_4160           | 4.36 | -          | TTGGATCTGTTCGCGCAT |
| LCP16 | C | 4659045 | 1.67 | NA   | NA   | YPK_4219 | NA                 | 4.83 | -          | GCGGCAAGCAAACAGCAT |

LCP = Low Confidence Peak, peak strength <2.5 and motif score <7.

Type= Type of binding site according to the position and direction of motif

PC= Peak Center base pair

PSL=Peak Strength Logarithmic phase

PSI=Peak Strength Virulence Inducing condition

PSO=Peak Strength Over-expression of  $\Delta rpoN$

PSSM= Position Specific Score Matrix
