# Supplementary material for: Genome-Scale Mapping Reveals Complex Regulatory Activities of RpoN in Yersinia pseudotuberculosis
Source: PubMed Central journal article supplement (PMC7657599; doi:10.1128/msystems.01006-20), 2020-11-10
Supplement: mSystems.01006-20-st003.pdf [file mSystems.01006-20-st003.pdf]

**TableS3: Global regulators differentially expressed in  $\Delta rpoN$** 

| Locus tag | Gene Name      | Description                                        | Stationary phase |             | Induction condition |             |
|-----------|----------------|----------------------------------------------------|------------------|-------------|---------------------|-------------|
|           |                |                                                    | log2FC           | P-adj value | log2FC              | P-adj value |
| YPK_0452  | <i>fis</i>     | Transcriptional regulator, Fis                     | 0.5              | 0.0146      | 4.3                 | 0.0000      |
| YPK_0634  | <i>rpoD</i>    | RNA polymerase sigma factor RpoD ( $\sigma^{70}$ ) | -0.1             | 0.1663      | 2.3                 | 0.0000      |
| YPK_1182  | <i>rpoE</i>    | RNA polymerase sigma factor RpoE ( $\sigma^{24}$ ) | -0.5             | 0.0000      | -2.1                | 0.0000      |
| YPK_2269  | <i>luxR</i>    | Two component LuxR family, FimZ                    | -0.1             | 0.5094      | -1.8                | 0.0000      |
| YPK_3425  | <i>rpoS</i>    | RNA polymerase sigma factor RpoS ( $\sigma^{38}$ ) | 0.4              | 0.0000      | -1.3                | 0.0000      |
| YPK_3976  | <i>rpoH</i>    | RNA polymerase factor RpoH ( $\sigma^{32}$ )       | 0.6              | 0.0000      | 2.6                 | 0.0000      |
| YPK_4132  | <i>cpxR</i>    | DNA-binding transcriptional regulator, CpxR        | 0.9              | 0.0000      | 2.0                 | 0.0000      |
| YPK_0001  | <i>dnaA</i>    | Chromosomal replication initiation protein, DnaA   | 0.7              | 0.0000      | -0.1                | 0.8541      |
| YPK_0248  | <i>crp/fnr</i> | CRP/FNR family transcriptional regulator, Crp      | -0.59            | 0.0000      | -1.61               | 0.0000      |
| YPK_1745  | <i>flhD</i>    | Transcriptional activator FlhD                     | -2.2             | 0.0000      | -1.8                | 0.0000      |
| YPK_1746  | <i>flhC</i>    | Transcriptional activator FlhC                     | -1.9             | 0.0000      | -1.4                | 0.0000      |
| YPK_1876  | <i>rovA</i>    | Transcriptional regulator, SlyA                    | -2.9             | 0.0000      | -1.9                | 0.0000      |
| YPK_1902  | <i>tyrR</i>    | DNA-binding transcriptional regulator, TyrR        | 0.0              | 0.8662      | 0.8                 | 0.0010      |
| YPK_2074  | <i>hns</i>     | DNA-binding protein, H-NS                          | -0.08            | 0.6141      | -0.85               | 0.0078      |
| YPK_2380  | <i>fliA</i>    | RNA polymerase sigma factor RpoD ( $\sigma^{28}$ ) | -2.97            | 0.0000      | -1.74               | 0.0001      |
| YPK_2385  | <i>araC</i>    | AraC family transcriptional regulator, AraC        | -1.7             | 0.0000      | -1.4                | 0.0001      |
| YPK_3223  | <i>asnC</i>    | Lrp/AsnC family transcriptional regulator, AsnC    | -0.63            | 0.0018      | -0.57               | 0.0135      |
| YPK_3372  | <i>csrA</i>    | Carbon storage regulator, CsrA                     | -0.12            | 0.5625      | 0.13                | 0.6673      |
| YPK_3606  | <i>arcA</i>    | Aerobic respiration control protein, ArcA          | -0.28            | 0.0790      | -0.27               | 0.8555      |
| YPK_3731  | <i>nusA</i>    | Termination/antitermination protein, NusA          | 0.0              | 0.9407      | 1.4                 | 0.0000      |
| YPK_4034  | <i>rho</i>     | Transcription termination factor, Rho              | 0.5              | 0.0000      | 1.4                 | 0.0000      |
