# Supplementary material for: Genome-Scale Mapping Reveals Complex Regulatory Activities of RpoN in Yersinia pseudotuberculosis
Source: PubMed Central journal article supplement (PMC7657599; doi:10.1128/msystems.01006-20), 2020-11-10
Supplement: mSystems.01006-20-st004.pdf [file mSystems.01006-20-st004.pdf]

**Table S4: Validations of productive RpoN binding**

| Group#   | Locus tag* | Gene function                                     | Expression compared to<br><i>Y. pseudotuberculosis</i> WT |                     |
|----------|------------|---------------------------------------------------|-----------------------------------------------------------|---------------------|
|          |            |                                                   | $\Delta rpoN$                                             | Binding site mutant |
|          | YPK_0329   | N-acetyltransferase                               | ↙                                                         | ↙                   |
|          | YPK_1886   | Putative tripeptide transporter permease, TppB    | ↗                                                         | ↗                   |
|          | YPK_1894   | Phage shock protein, PspA                         | ↙                                                         | ↙                   |
| <b>A</b> | YPK_2909   | Zinc resistance protein, ZraP                     | ↗                                                         | ↗                   |
|          | YPK_2908   | Sensor kinase, ZraS                               | ↙                                                         | ↙                   |
|          | YPK_2927   | Asparagine synthetase B, AsnB                     | ↙                                                         | -                   |
|          | YPK_3010   | Glutamate and aspartate transporter subunit, GltI | ↙                                                         | ↙                   |
|          | YPK_2997   | Glucosamine-6-phosphate deaminase, NagB           | ↗                                                         | ↗                   |
|          | YPK_3962   | Glycerol-3-phosphate transporter , UgpB           | ↗                                                         | ↗                   |
| <b>D</b> | YPK_3075   | 2,5-didehydrogluconate reductase, DkgA            | ↗                                                         | ↗                   |
|          | YPK_3613   | Soluble lytic murein transglycosylase, Slt        | ↗                                                         | ↗                   |
|          | YPK_3887   | NmrA family protein                               | ↗                                                         | -                   |

# grouping of binding sites depending on position (A) intergenic sense strand (D) intragenic anti sense strand

\*locus tag for downstream gene (A) or gene on corresponding sense strand

↙ = Down-regulated in  $\Delta rpoN$ /WT

↗ = Up-regulated in RpoN binding site mutant/WT

- = No change in relative expression
