# Supplementary material for: Genome-Scale Mapping Reveals Complex Regulatory Activities of RpoN in Yersinia pseudotuberculosis
Source: PubMed Central journal article supplement (PMC7657599; doi:10.1128/msystems.01006-20), 2020-11-10
Supplement: mSystems.01006-20-st005.pdf [file mSystems.01006-20-st005.pdf]

**Table S5: List of strains used in this study**

| Strain or plasmid                           | Relevant phenotype                                                                                                                                                                          | Reference              | RpoN binding site mutation                    |
|---------------------------------------------|---------------------------------------------------------------------------------------------------------------------------------------------------------------------------------------------|------------------------|-----------------------------------------------|
| <b><i>E. coli</i></b>                       |                                                                                                                                                                                             |                        |                                               |
| S17-1 λ-pir                                 | <i>recA, thi, pro, hsdR</i> +, SmR, <RP4:2-Tc:Mu:Km:Tn7>TpR                                                                                                                                 |                        |                                               |
| pUC57-3xV5 / DH5α                           | pUC 57 derivative containing a 129bp fragment of 3xV5                                                                                                                                       | This study             |                                               |
| <b><i>Y. pseudotuberculosis</i></b>         |                                                                                                                                                                                             |                        |                                               |
| YpIII/pIBX (wt)                             | YpIII strain with Tn5 <i>luxCDABE</i> inserted in the Tn1000 resolvase homolog in pCD1 (wild type); KmR                                                                                     | Caliper Life Sciences, |                                               |
| YpIII,Δ <i>rpoN</i> /pIBX                   | In frame deletion of <i>rpoN</i> (YPK_0505); Km <sup>r</sup>                                                                                                                                | This study             |                                               |
| YpIII, <i>rpoN</i> :V5/pIBX                 | <i>rpoN</i> tagged with 3xV5                                                                                                                                                                | This study             |                                               |
| YpIII,Δ <i>rpoN</i> /pIBX, <i>prpoN</i>     | Δ <i>rpoN</i> transcomplemented                                                                                                                                                             | This study             |                                               |
| YpIII,Δ <i>rpoN</i> /pIBX, <i>prpoN</i> :V5 | V5-overexpressing YpIII,Δ <i>rpoN</i> /pIBX strain                                                                                                                                          | This study             |                                               |
| YpIII,YPK_0329_BS-mut/pIBX                  | Mutations in rpoN Binding Site upstream of YPK_0329                                                                                                                                         | This study             | <b>tgta</b> ctgtttat <b>gag</b> tt            |
| YpIII,YPK_0464_BS-mut/pIBX                  | Mutations in rpoN Binding Site in YPK_0464                                                                                                                                                  | This study             | at <b>cat</b> ccggtttatt <b>aaga</b>          |
| YpIII,YPK_1170_BS-mut/pIBX                  | Mutations in rpoN Binding Site in YPK_1170                                                                                                                                                  | This study             | ca <b>agc</b> cttgattat <b>caa</b>            |
| YpIII,YPK_1886_BS-mut/pIBX                  | Mutations in rpoN Binding Site upstream of YPK_1886                                                                                                                                         | This study             | <b>tgta</b> cacgcatt <b>gag</b> ct            |
| YpIII,YPK_1894_BS-mut/pIBX                  | Mutations in rpoN Binding Site upstream of YPK_1894                                                                                                                                         | This study             | <b>tc</b> atcacgact <b>ctact</b> tt           |
| YpIII,YPK_2431_BS-mut/pIBX                  | Mutations in rpoN Binding Site in YPK_2431                                                                                                                                                  | This study             | tt <b>ag</b> ctc <b>gctt</b> ct <b>aa</b> gc  |
| YpIII,YPK_2908_BS-mut/pIBX                  | Mutations in rpoN Binding Site upstream of YPK_2908                                                                                                                                         | This study             | <b>ag</b> ta <b>cat</b> gataat <b>gag</b> tt  |
| YpIII,YPK_2909_BS-mut/pIBX                  | Mutations in rpoN Binding Site upstream of YPK_2909                                                                                                                                         | This study             | <b>tg</b> ta <b>cat</b> gagat <b>gag</b> ct   |
| YpIII,YPK_2927_BS-mut/pIBX                  | Mutations in rpoN Binding Site upstream of YPK_2927                                                                                                                                         | This study             | <b>tg</b> ta <b>cca</b> agat <b>gag</b> tt    |
| YpIII,YPK_2997_BS-mut/pIBX                  | Mutations in rpoN Binding Site in YPK_2997                                                                                                                                                  | This study             | <b>tg</b> cca <b>aca</b> agatt <b>gag</b> cat |
| YpIII,YPK_3010_BS-mut/pIBX                  | Mutations in rpoN Binding Site upstream of YPK_3010                                                                                                                                         | This study             | <b>cg</b> ta <b>caca</b> aac <b>ctgag</b> at  |
| YpIII,YPK_3075_BS-mut/pIBX                  | Mutations in rpoN Binding Site in YPK_3075                                                                                                                                                  | This study             | at <b>ag</b> ct <b>ctg</b> att <b>acc</b> c   |
| YpIII,YPK_3583_BS-mut/pIBX                  | Mutations in rpoN Binding Site in YPK_3583                                                                                                                                                  | This study             | <b>cagg</b> ac <b>ctcat</b> g <b>accgag</b>   |
| YpIII,YPK_3613_BS-mut/pIBX                  | Mutations in rpoN Binding Site in YPK_3613                                                                                                                                                  | This study             | ct <b>gtg</b> ataaat <b>ctg</b> gt            |
| YpIII,YPK_3887_BS-mut/pIBX                  | Mutations in rpoN Binding Site in YPK_3887                                                                                                                                                  | This study             | <b>cg</b> cat <b>cca</b> at <b>caag</b> cat   |
| YpIII,YPK_3962_BS-mut/pIBX                  | Mutations in rpoN Binding Site in YPK_3962                                                                                                                                                  | This study             | <b>gacc</b> ag <b>catgtt</b> ag <b>cat</b>    |
| <b>Plasmids</b>                             |                                                                                                                                                                                             |                        |                                               |
| pDM4                                        | Suicide vector for construction of deletion and Binding site mutants; <i>sacBR</i> ; <i>oriR6K</i> ; CmR                                                                                    | Milton et al., 1996    |                                               |
| <i>prpoN</i>                                | <i>rpoN</i> under araBAD promoter in pBAD24; CbR                                                                                                                                            | This study             |                                               |
| <i>prpoN</i> :V5                            | <i>rpoN</i> C-terminal tagged with 3xV5 under the araBAD promoter in pBAD18; CbR                                                                                                            | This study             |                                               |
| pDM4-YPK_0505                               | The flanking DNA regions of the YPK_0505 gene were PCR amplified from <i>pseudotuberculosis</i> genome using primers xxxx and cloned in the pDM4 <i>Y.</i> plasmid by SacI-XhoI restriction | This study             |                                               |
| pDM4-0329_BS-mut                            | The mutated rpoN Binding Site in YPK_0329 including flanking regions were cloned in the pDM4 plasmid by SacI-XhoI restriction                                                               | This study             |                                               |
| pDM4-0464_BS-mut                            | The mutated rpoN Binding Site in YPK_0464 including flanking regions were cloned in the pDM4 plasmid by SacI-XhoI restriction                                                               | This study             |                                               |
| pDM4-1170_BS-mut                            | The mutated rpoN Binding Site upstream of YPK_1170 including flanking regions were cloned in the pDM4 plasmid by SacI-XhoI restriction                                                      | This study             |                                               |
| pDM4-1886_BS-mut                            | The mutated rpoN Binding Site in YPK_1886 including flanking regions were cloned in the pDM4 plasmid by SacI-XhoI restriction                                                               | This study             |                                               |
| pDM4-1894_BS-mut                            | The mutated rpoN Binding Site upstream of YPK_1894 including flanking regions were cloned in the pDM4 plasmid by SacI-XhoI restriction                                                      | This study             |                                               |
| pDM4-2431_BS-mut                            | The mutated rpoN Binding Site in YPK_2431 including flanking regions were cloned in the pDM4 plasmid by SacI-XhoI restriction                                                               | This study             |                                               |
| pDM4-2908_BS-mut                            | The mutated rpoN Binding Site upstream of YPK_2908 including flanking regions were cloned in the pDM4 plasmid by SacI-XhoI restriction                                                      | This study             |                                               |
| pDM4-2909_BS-mut                            | The mutated rpoN Binding Site upstream of YPK_2909 including flanking regions were cloned in the pDM4 plasmid by SacI-XhoI restriction                                                      | This study             |                                               |
| pDM4-2927_BS-mut                            | The mutated rpoN Binding Site in YPK_2927 including flanking regions were cloned in the pDM4 plasmid by SacI-XhoI restriction                                                               | This study             |                                               |
| pDM4-2997_BS-mut                            | The mutated rpoN Binding Site in YPK_2997 including flanking regions were cloned in the pDM4 plasmid by SacI-XhoI restriction                                                               | This study             |                                               |

|                  |                                                                                                                                        |            |
|------------------|----------------------------------------------------------------------------------------------------------------------------------------|------------|
| pDM4-3010_BS-mut | The mutated rpoN Binding Site upstream of YPK_3010 including flanking regions were cloned in the pDM4 plasmid by SacI-XhoI restriction | This study |
| pDM4-3075_BS-mut | The mutated rpoN Binding Site upstream of YPK_3075 including flanking regions were cloned in the pDM4 plasmid by SacI-XhoI restriction | This study |
| pDM4-3583_BS-mut | The mutated rpoN Binding Site in YPK_3583 including flanking regions were cloned in the pDM4 plasmid by SacI-XhoI restriction          | This study |
| pDM4-3613_BS-mut | The mutated rpoN Binding Site in YPK_3613 including flanking regions were cloned in the pDM4 plasmid by SacI-XhoI restriction          | This study |
| pDM4-3887_BS-mut | The mutated rpoN Binding Site in YPK_3887 including flanking regions were cloned in the pDM4 plasmid by SacI-XhoI restriction          | This study |
| pDM4-3962_BS-mut | The mutated rpoN Binding Site in YPK_3962 including flanking regions were cloned in the pDM4 plasmid by SacI-XhoI restriction          | This study |
