# Supplementary material for: Genome-Scale Mapping Reveals Complex Regulatory Activities of RpoN in Yersinia pseudotuberculosis
Source: PubMed Central journal article supplement (PMC7657599; doi:10.1128/msystems.01006-20), 2020-11-10
Supplement: mSystems.01006-20-st006.pdf [file mSystems.01006-20-st006.pdf]

**Table S6: Primers used in this study**

| Primer name    | Sequence (5' to 3')                               | Vector/Template       |
|----------------|---------------------------------------------------|-----------------------|
| A.del.rpoN.Xho | ACCGTCGACCCTCGAGGGTTGACCCAATTTCAAGTATC            | pDM4/YPIII            |
| B.del.rpoN     | GTTCCAGGTCAAACCAGACCTTGCTTCATAATGCTGTATC          | pDM4/YPIII            |
| C.del.rpoN     | TTATGAAGCAAGGTCTGGTTTGACCTGAACTGAGAA              | pDM4/YPIII            |
| D.del.rpoN.Sac | TGGAATCCCAGGAGAGCTCGAGTGTAGAACCTTTGCTGAGTA        | pDM4/YPIII            |
| Kpn.rpoN.F     | GCGAATTCGAGCTCGGTACCAGGAGAAACGATGAAGCAAGGTCTGCAAC | pBAD18/YPIII          |
| Sal.rpoN.R     | TAGGCTTACCGTCGACAACCAACTGTTTACGTTGAT              | pBAD18/YPIII          |
| Sal.V5.F       | GTAACAGTTGTTGTGCGACGGTAAGCCTATCC                  | pBAD18/pUC57:3xV5     |
| Xho.V5.R       | ATGCCTGCAGGTGCGATCAGTGTGCTGTCAA                   | pBAD18/pUC57:3xV5     |
| A.rpoN.V5.Sac  | TGGAATCCCAGGAGAGCTCAGGCTGTGGATATGCATG             | pDM4/pBAD18.rpoN:3xV5 |
| B.rpoN.V5      | TCTCAGTTCAGGTCACGTGCTGTCAAGGCCAAG                 | pDM4/pBAD18.rpoN:3xV5 |
| C.rpoN.V5      | GGCCTTGACAGCACGTGACCTGAACTGAGAAGGAATAG            | pDM4/YPIII            |
| D.rpoN.V5.Xho  | ACCGTCGACCCTCGACCTTTGCTGAGTAATAACAGC              | pDM4/YPIII            |
| 0329_BS.A      | ACCGTCGACCCTCGAGTCTACCAACTGAGCTATGCC              | pDM4/YPIII            |
| 0329_BS.B      | CTCATAAACAAGTACAACCTTATAAAGTGGGCGAGTAGTAA         | pDM4/YPIII            |
| 0329_BS.C      | GTACTTGTTTATGAGTTAGCAATGGATATCAGAGCAGAC           | pDM4/YPIII            |
| 0329_BS.D      | TGGAATCCCAGGAGAGCTCTTATGCTCTATCCCAGTGCG           | pDM4/YPIII            |
| 0464_BS.A      | ACCGTCGACCCTCGAGCCCGTTACTGTTGATGGC                | pDM4/YPIII            |
| 0464_BS.B      | TCTTAATAAACGGATGATTTGGCGGATTTCTTCGAT              | pDM4/YPIII            |
| 0464_BS.C      | CATCCGTTTATAAGAGGCGTAGGCTGCAAAGTG                 | pDM4/YPIII            |
| 0464_BS.D      | TGGAATCCCAGGAGAGCTCAACGATCAGGCTAACATG             | pDM4/YPIII            |
| 1170_BS.A      | ACCGTCGACCCTCGAGTTCAGCAGGAAGGCATCA                | pDM4/YPIII            |
| 1170_BS.B      | TGAATAATCCAAGCTTGCGCCGCTCTTTCAA                   | pDM4/YPIII            |
| 1170_BS.C      | AGCTTGATTATTCAAATTAAGAGTGCACATCAGGC               | pDM4/YPIII            |
| 1170_BS.D      | TGGAATCCCAGGAGAGCTCAGATAATCGCCCGAAAG              | pDM4/YPIII            |
| 1886_BS.A      | ACCGTCGACCCTCGAGCGCTTAATCATCAGCATGT               | pDM4/YPIII            |
| 1886_BS.B      | GCTCAAATGCGTGTACACAAAAATAGTTGTGTAATTTTT           | pDM4/YPIII            |
| 1886_BS.C      | TACACGCATTTGAGCTATTCTGCCTCGCCCTG                  | pDM4/YPIII            |
| 1886_BS.D      | TGGAATCCCAGGAGAGCTCAGATGATTAGCGCGGTT              | pDM4/YPIII            |
| 1894_BS.A      | ACCGTCGACCCTCGAGGCTTCATGGCCGAATAAC                | pDM4/YPIII            |
| 1894_BS.B      | CTCAGAGTCGTGTACACTTTTCATGATAATTAATAGCATG          | pDM4/YPIII            |
| 1894_BS.C      | GTACACGACTCTGAGTTAACTCTATGTGAAGCGTATTG            | pDM4/YPIII            |
| 1894_BS.D      | TGGAATCCCAGGAGAGCTCGTTTTAGCGTCTCAACTAAC           | pDM4/YPIII            |
| 2431_BS.A      | ACCGTCGACCCTCGAGGCATAACTTCACTTGCAAACC             | pDM4/YPIII            |
| 2431_BS.B      | TAGCTCGCTTCTAAGCCGTAGCTTGCCGCAAAT                 | pDM4/YPIII            |
| 2431_BS.C      | TTAGGAAGCGAGCTAATAATGCCGTAGTGCATGATTAAC           | pDM4/YPIII            |
| 2431_BS.D      | TGGAATCCCAGGAGAGCTCCGCACCATTATAGAAACTGG           | pDM4/YPIII            |
| 2908_BS.A      | ACCGTCGACCCTCGAGGGTCTTAATCGCCATAG                 | pDM4/YPIII            |
| 2908_BS.B      | GTACATGATAATGAGTTTAAATAATGGTTGTTTTTTAG            | pDM4/YPIII            |
| 2808_BS.C      | CTCATTATCATGTACTTAGCATATTGGCATTAGGAAT             | pDM4/YPIII            |
| 2808_BS.D      | TGGAATCCCAGGAGAGCTCCATGGAACTTTCCAGAGT             | pDM4/YPIII            |
| 2809_BS.B      | CTCATTCTATGTACATATGCTAATGGCATGATAATTGC            | pDM4/YPIII            |
| 2809_BS.C      | GTACATAGGAATGAGCTTAACGTAATAAGCTTACTACG            | pDM4/YPIII            |
| 2927_BS.A      | ACCGTCGACCCTCGAGACTCAATCAACCCACAGAG               | pDM4/YPIII            |
| 2927_BS.B      | CTCACTCTTGATACAGTTGCCGAACACAGAAGTA                | pDM4/YPIII            |
| 2927_BS.C      | GTATCCAAGAGTGAGTTGATCTCTGTAGATTATCTGAAGG          | pDM4/YPIII            |
| 2927_BS.D      | TGGAATCCCAGGAGAGCTCGCTCCAGATTGATATCCCAG           | pDM4/YPIII            |
| 2997_BS.A      | ACCGTCGACCCTCGAGTACGTTGGCTTGCCGAAA                | pDM4/YPIII            |
| 2997_BS.B      | TTGCCAACAAGATTAGCATCACCACCAAAGAAACG               | pDM4/YPIII            |
| 2997_BS.C      | TAATCTTGTGGCAAATATGCATTGACGTTGGG                  | pDM4/YPIII            |
| 2997_BS.D      | TGGAATCCCAGGAGAGCTCATCAGCAACGACAACAGC             | pDM4/YPIII            |
| 3010_BS.A      | ACCGTCGACCCTCGAGGGTTGGTCACTCCATTG                 | pDM4/YPIII            |
| 3010_BS.B      | CTCAGGTTTGTGTACGTAGGGGGGAACTAAGC                  | pDM4/YPIII            |
| 3010_BS.C      | GTACACAAACCTGAGATTATTTCTACTAGTATG                 | pDM4/YPIII            |
| 3010_BS.D      | TGGAATCCCAGGAGAGCTCTCTTCTAATGGCATCCAC             | pDM4/YPIII            |
| 3583_BS.A      | ACCGTCGACCCTCGAGCCAGTGGCGCTAAAACAGTA              | pDM4/YPIII            |
| 3583_BS.B      | TCCGTCATGAGTCTGGGCTGGCTTCTGGATGC                  | pDM4/YPIII            |
| 3583_BS.C      | GGACCTCATGACGGAGCGCCATTGTTGATCATTTTATC            | pDM4/YPIII            |

|           |                                         |            |
|-----------|-----------------------------------------|------------|
| 3583_BS.D | TGGAATCCCGGGAGAGCTCAAGTTGCATCGGCCATTTCC | pDM4/YPIII |
| 3887_BS.A | ACCGTCGACCCTCGAGTCGGCTGATCATTGACAC      | pDM4/YPIII |
| 3887_BS.B | CGCATTCAATCAAAGCATAAGCTTGATAATATGTCGCG  | pDM4/YPIII |
| 3887_BS.C | CTTTGATTGAATGCGGATTAGCCCGTAAGGTAAAAATG  | pDM4/YPIII |
| 3887_BS.D | TGGAATCCCGGGAGAGCTCCGTCATTCATACCCTTGG   | pDM4/YPIII |
| 3962_BS.A | ACCGTCGACCCTCGAGCTCTTCATCAACCACGGT      | pDM4/YPIII |
| 3962_BS.B | GCTAACAATGCTGGTCAAACGCCATTATTGGTGG      | pDM4/YPIII |
| 3962_BS.C | ACCAGCATTGTTAGCATCTGCGTCATACGGCAT       | pDM4/YPIII |
| 3962_BS.D | TGGAATCCCGGGAGAGCTCGGGTTCTAGTTGCGGTTA   | pDM4/YPIII |
| 3613_BS.A | ACCGTCGACCCTCGAGCAACTGCCCGTAATGACT      | pDM4/YPIII |
| 3613_BS.B | CACAGGATTTATCACAGGTGAGTACGGCGCAAG       | pDM4/YPIII |
| 3613_BS.C | GTGATAAATCCTGTGTCAACTGACGGTATTCCAAATAAG | pDM4/YPIII |
| 3613_BS.D | TGGAATCCCGGGAGAGCTCTTACTGCCTATCTGCGAC   | pDM4/YPIII |
| 3075_BS.A | ACCGTCGACCCTCGAGGAAACGCAAGTAGGGAATGC    | pDM4/YPIII |
| 3075_BS.B | TAGCTCTGATCTTACCCGCCTGGTGTAAATCTTC      | pDM4/YPIII |
| 3075_BS.C | GTAAGATCAGAGCTATTGGCGTCAGTAACCTTCATC    | pDM4/YPIII |
| 3075_BS.D | TGGAATCCCGGGAGAGCTCCAGCGTAATACAACCTGTC  | pDM4/YPIII |
